# Supplementary material for: Sporozoite immunization of human volunteers under chemoprophylaxis induces functional antibodies against pre-erythrocytic stages of Plasmodium falciparum
Source: PubMed Central journal article supplement (PMC4113136; doi:10.1186/1475-2875-13-136), 2014-04-05
Supplement: 1475-2875-13-136-S1.pdf [file 1475-2875-13-136-S1.pdf]

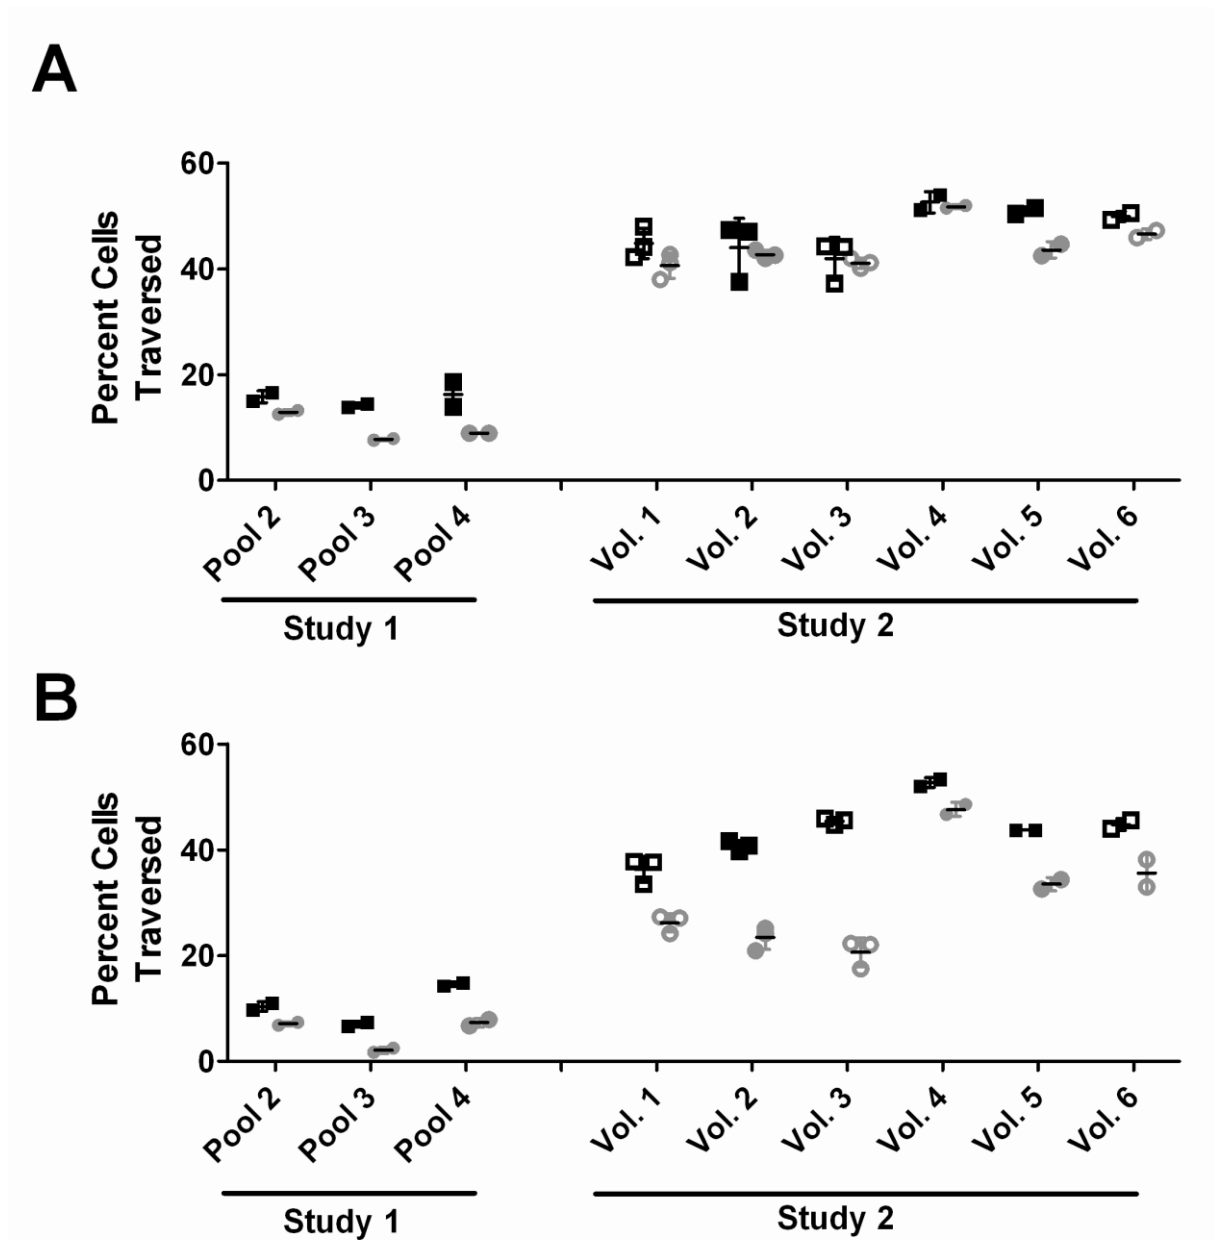

**Supplementary Figure 1. Replicates from *in vitro* traversal experiments.**

Replicates from traversal experiments conducted with either 1 mg/ml (A) or 10 mg/ml (B) of pre- or post-immunization IgG from three pools of two volunteers (Study 1) or six individual volunteers (Study 2) are shown. Data are expressed as the mean percentage cells traversed  $\pm$  SD. Black squares and grey circles represent the percentage cells traversed by sporozoites incubated with either pre-immunization or post-immunization IgG, respectively. Filled symbols show volunteers protected against mosquito challenge. Open symbols represent

volunteers with unknown protection status regarding mosquito challenge (blood-stage challenged).
