# Supplementary material for: Sporozoite immunization of human volunteers under chemoprophylaxis induces functional antibodies against pre-erythrocytic stages of Plasmodium falciparum
Source: PubMed Central journal article supplement (PMC4113136; doi:10.1186/1475-2875-13-136), 2014-04-05
Supplement: 1475-2875-13-136-S2.pdf [file 1475-2875-13-136-S2.pdf]

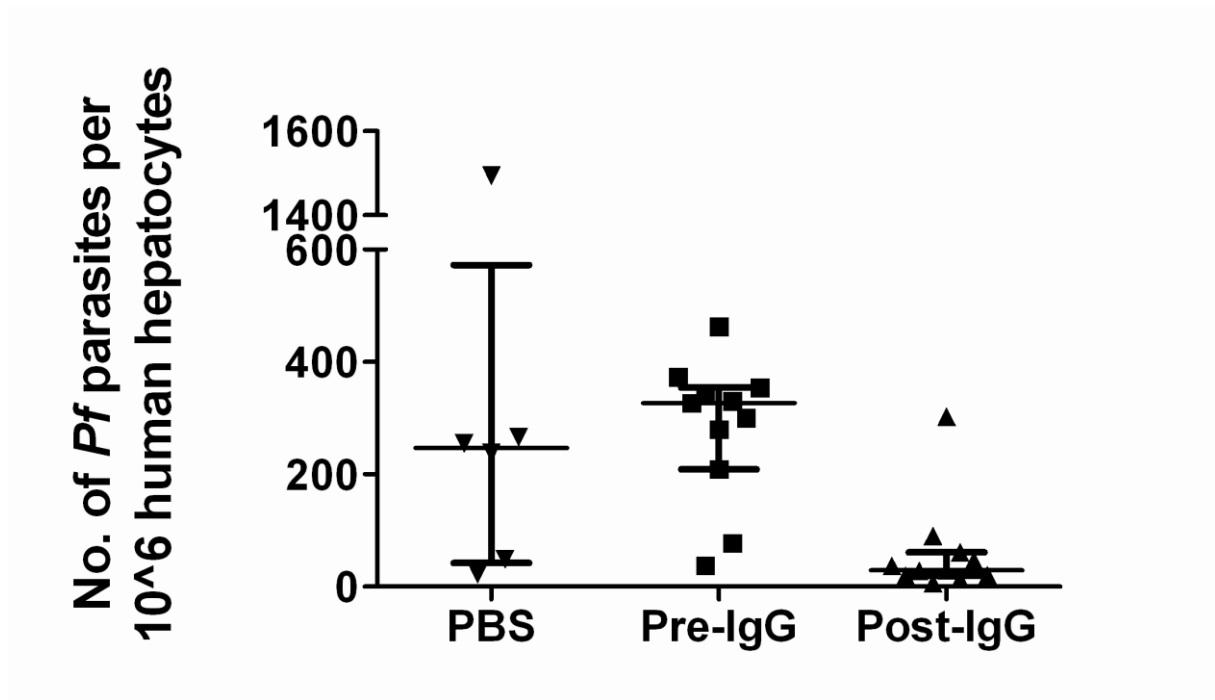

**Supplementary Figure 2. *In vivo* mosquito bite challenge experiments in human liver-chimeric mice.**

Data from human liver-chimeric mouse experiments conducted with 10 mg of pre- or post-immunization IgG are shown. Mice injected with PBS could not be directly included in the IgG experiments due to limited availability of chimeric mouse numbers, however, PBS-injected mice used in other parallel experiments performed in the same time frame showed the same range in liver parasite burden as mice receiving pre-immunization IgG. Data are expressed as the median parasite load per million human hepatocytes  $\pm$  interquartile range.
