# Supplementary material for: Sporozoite immunization of human volunteers under chemoprophylaxis induces functional antibodies against pre-erythrocytic stages of Plasmodium falciparum
Source: PubMed Central journal article supplement (PMC4113136; doi:10.1186/1475-2875-13-136), 2014-04-05
Supplement: 1475-2875-13-136-S3.pdf [file 1475-2875-13-136-S3.pdf]

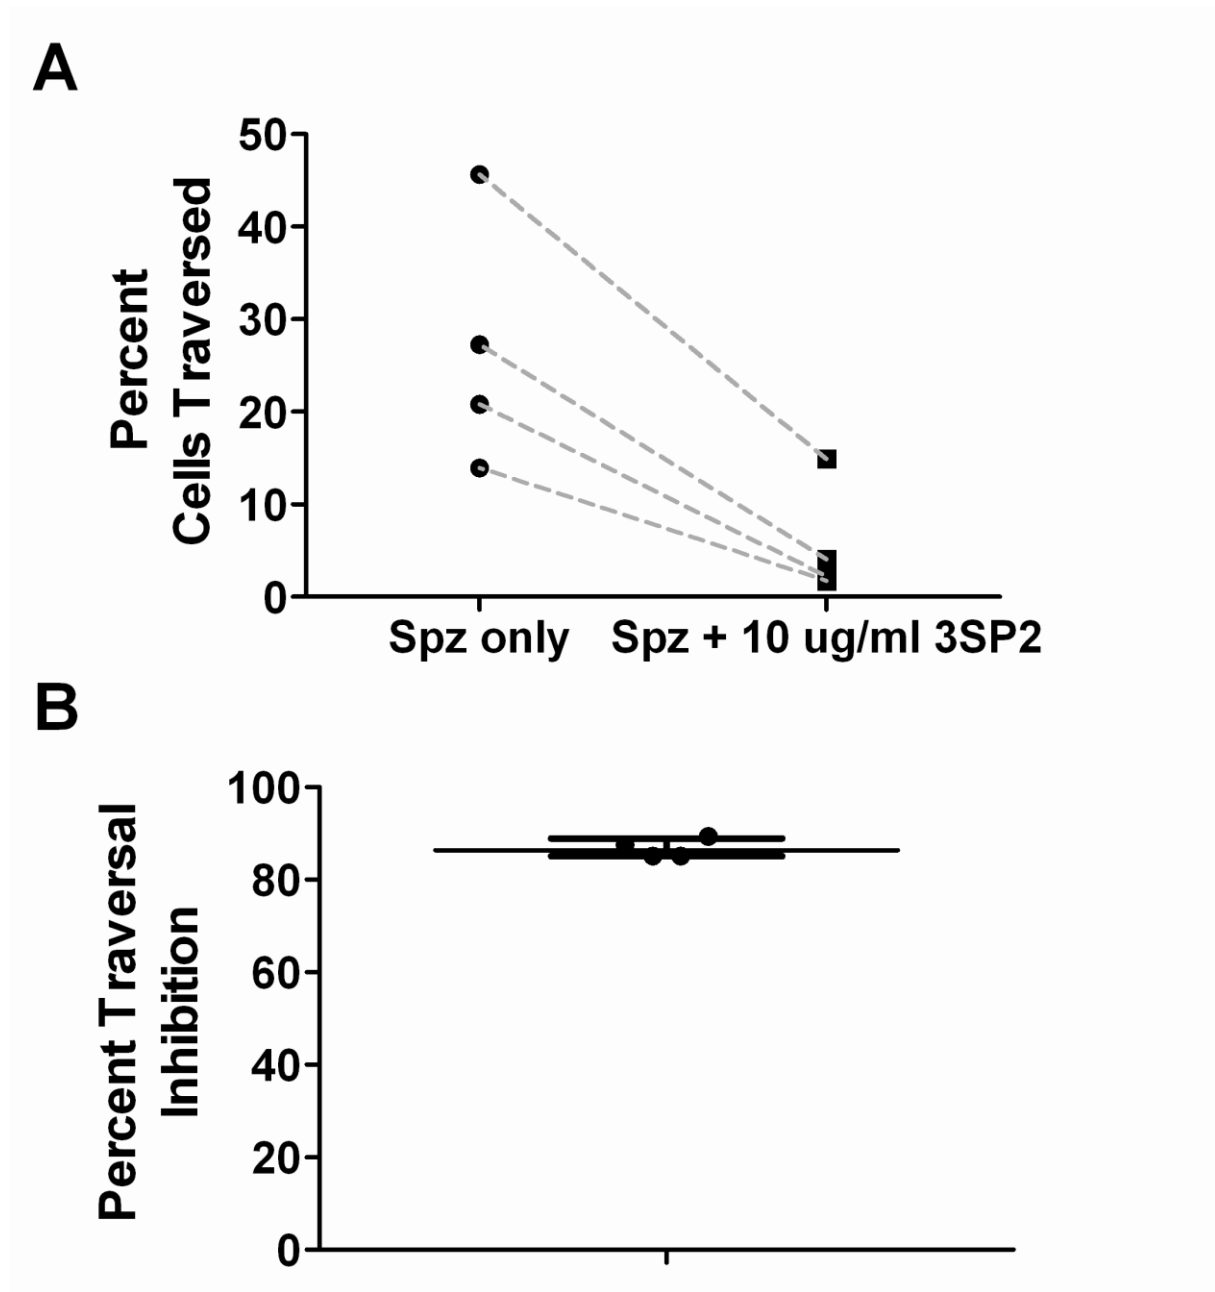

**Supplementary Figure 3. Sporozoites incubated with or without 10 µg/ml anti-CSP antibody.**

Data from 4 independent traversal experiments conducted with or without 10 µg/ml of monoclonal anti-CSP antibody are shown. **(A)** Data are expressed as the mean percentage cells traversed. Black circles and squares represent the percentage cells traversed by sporozoites incubated without or with 10 µg/ml anti-CSP antibody, respectively. **(B)** The percentage inhibition of traversal was calculated for sporozoites only compared to sporozoites

incubated with 10 µg/ml anti-CSP antibody. Data are expressed as the median percentage traversal inhibition  $\pm$  interquartile range.
